# Supplementary material for: Antimicrobial and Anticancer Application of Silver(I) Dipeptide Complexes
Source: MDPI journal article supplement (doi:10.3390/molecules26216335), 2021-10-20
Supplement: s1 [file s1]

## Supplementary material

### **A strong perspective on antimicrobial and anticancer application of silver(I) dipeptide complexes**

Gabriela Kuzderová<sup>1</sup>, Michaela Rendošová<sup>1</sup>, Róbert Gyepes<sup>2</sup>, Simona Sovová<sup>3</sup>, Danica Sabolová<sup>3</sup>, Mária Vilková<sup>4</sup>, Petra Olejníková<sup>5</sup>, Ivana Bačová<sup>5</sup>, Simonida Stokič<sup>5</sup>, Martin Kello<sup>6</sup>, Zuzana Vargová<sup>1\*</sup>

<sup>1</sup>*Department of Inorganic Chemistry, P. J. Šafárik University, Moyzesova 11, 041 54 Kosice, Slovakia*

<sup>2</sup>*Department of Inorganic Chemistry, Charles University, Hlavova 2030, 128 00 Prague, Czech Republic*

<sup>3</sup>*Department of Biochemistry, P. J. Šafárik University, Moyzesova 11, 041 54 Kosice, Slovakia*

<sup>4</sup>*NMR Laboratory, P. J. Šafárik University, Moyzesova 11, 041 54 Kosice, Slovakia*

<sup>5</sup>*Department of Biochemistry and Microbiology, Slovak University of Technology, Radlinského 9, 812 37 Bratislava, Slovak Republic*

<sup>6</sup>*Department of Pharmacology, Faculty of Medicine, P. J. Šafárik University, Trieda SNP 1, 04011 Košice, Slovak Republic*

Figure S1. IR spectra of ligand HGlyGly, HGlyAla, H<sub>2</sub>GlyAsp and their AgGlyGly, AgGlyAla and AgGlyAsp complexes.

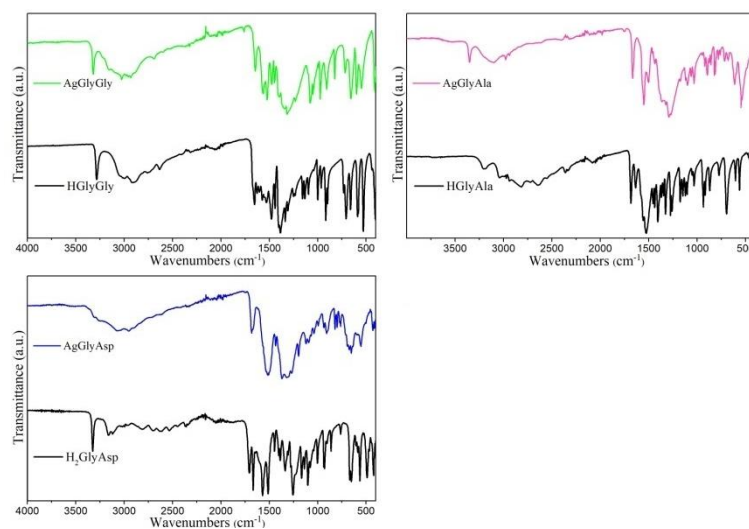

Figure S2A-C. <sup>1</sup>H NMR spectra of HGlyGly ligand and time dependent spectra of AgGlyGly complex recorded in 1% DMSO d<sub>6</sub>/D<sub>2</sub>O (A), HGlyAla ligand and time dependent spectra of AgGlyAla complex (B) and H<sub>2</sub>GlyGly ligand and time dependent spectra of AgGlyAsp complex (C).

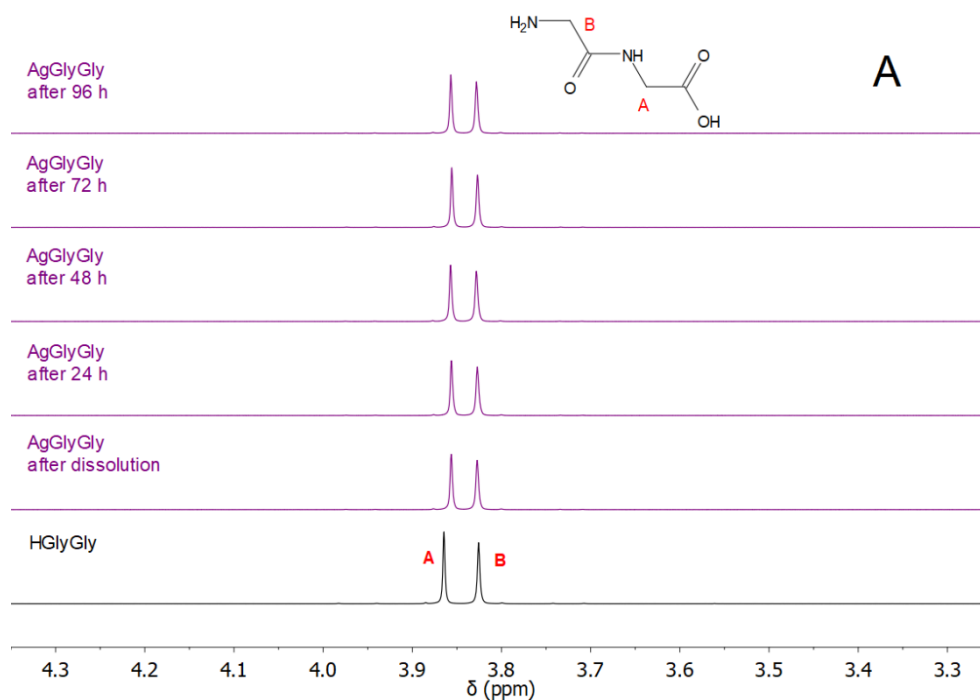

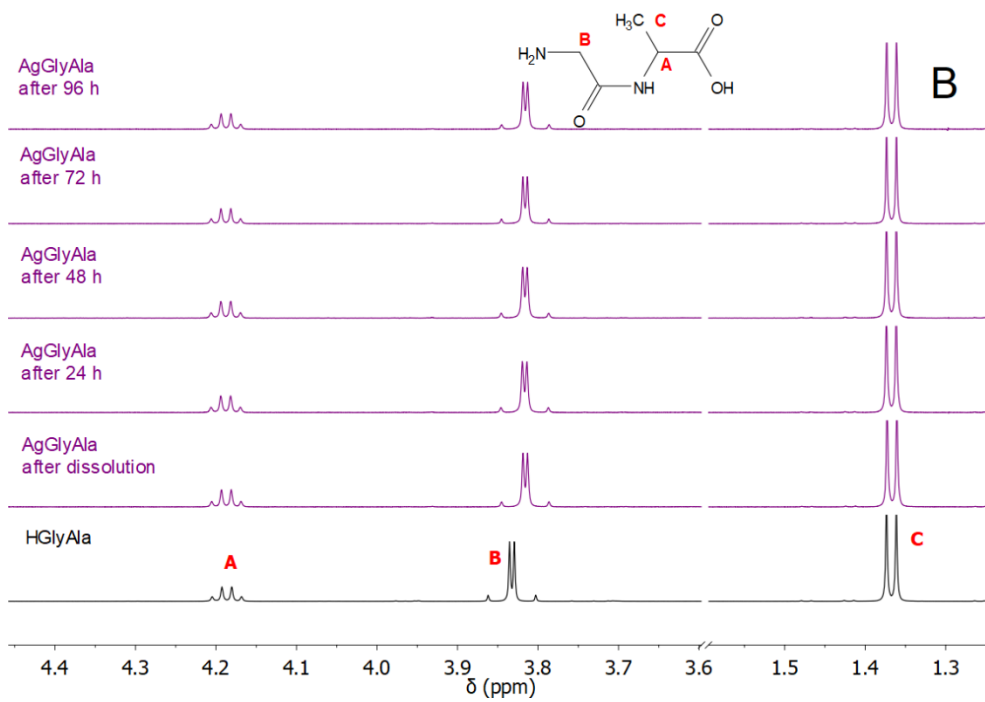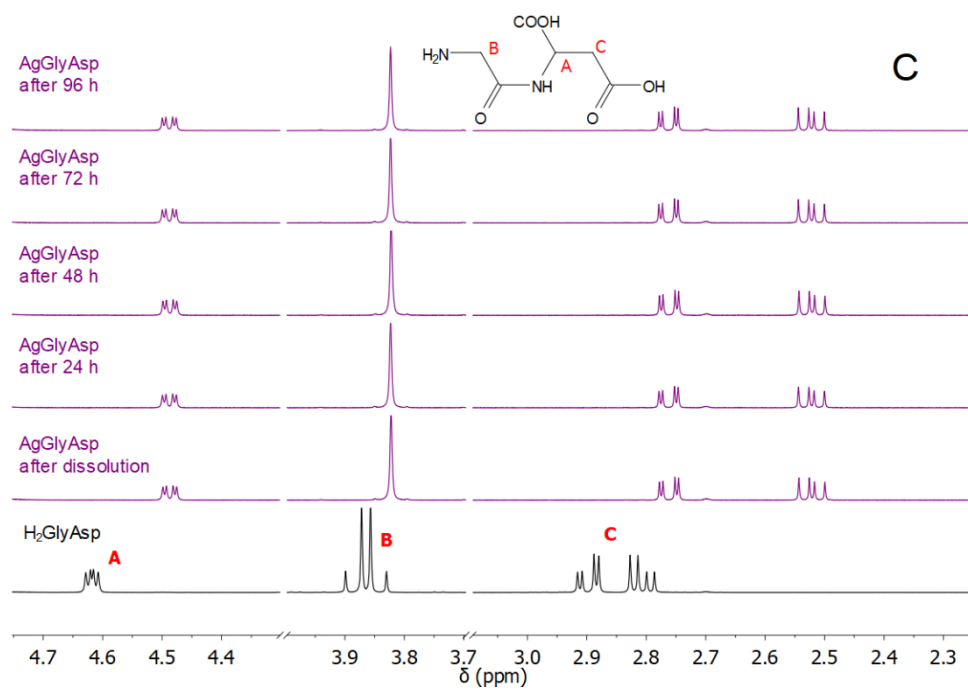

Figure S3. Spectroscopic titration in Tris-HCl solution for the AgGlyGly complex during titration with increasing amounts of CT DNA.

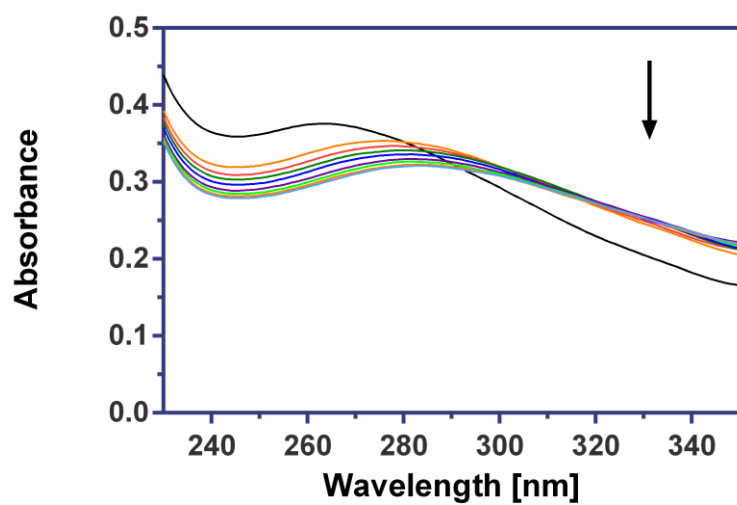

Figure S4. Spectroscopic titration in Tris-HCl solution for the AgGlyAla complex during titration with increasing amounts of CT DNA.

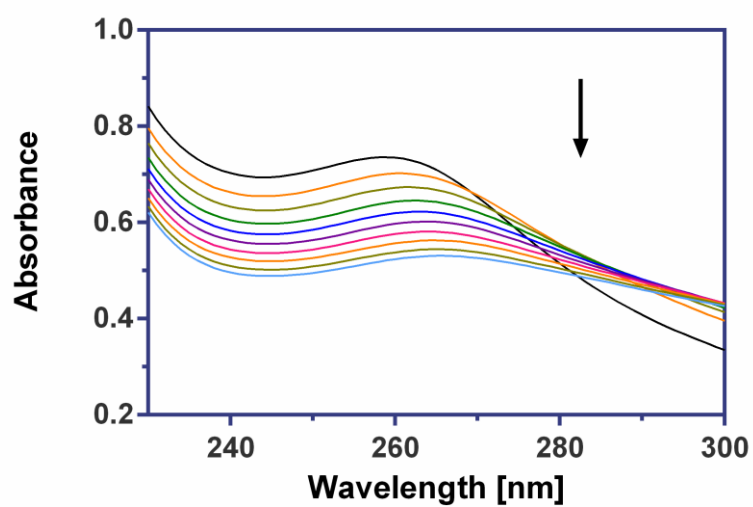

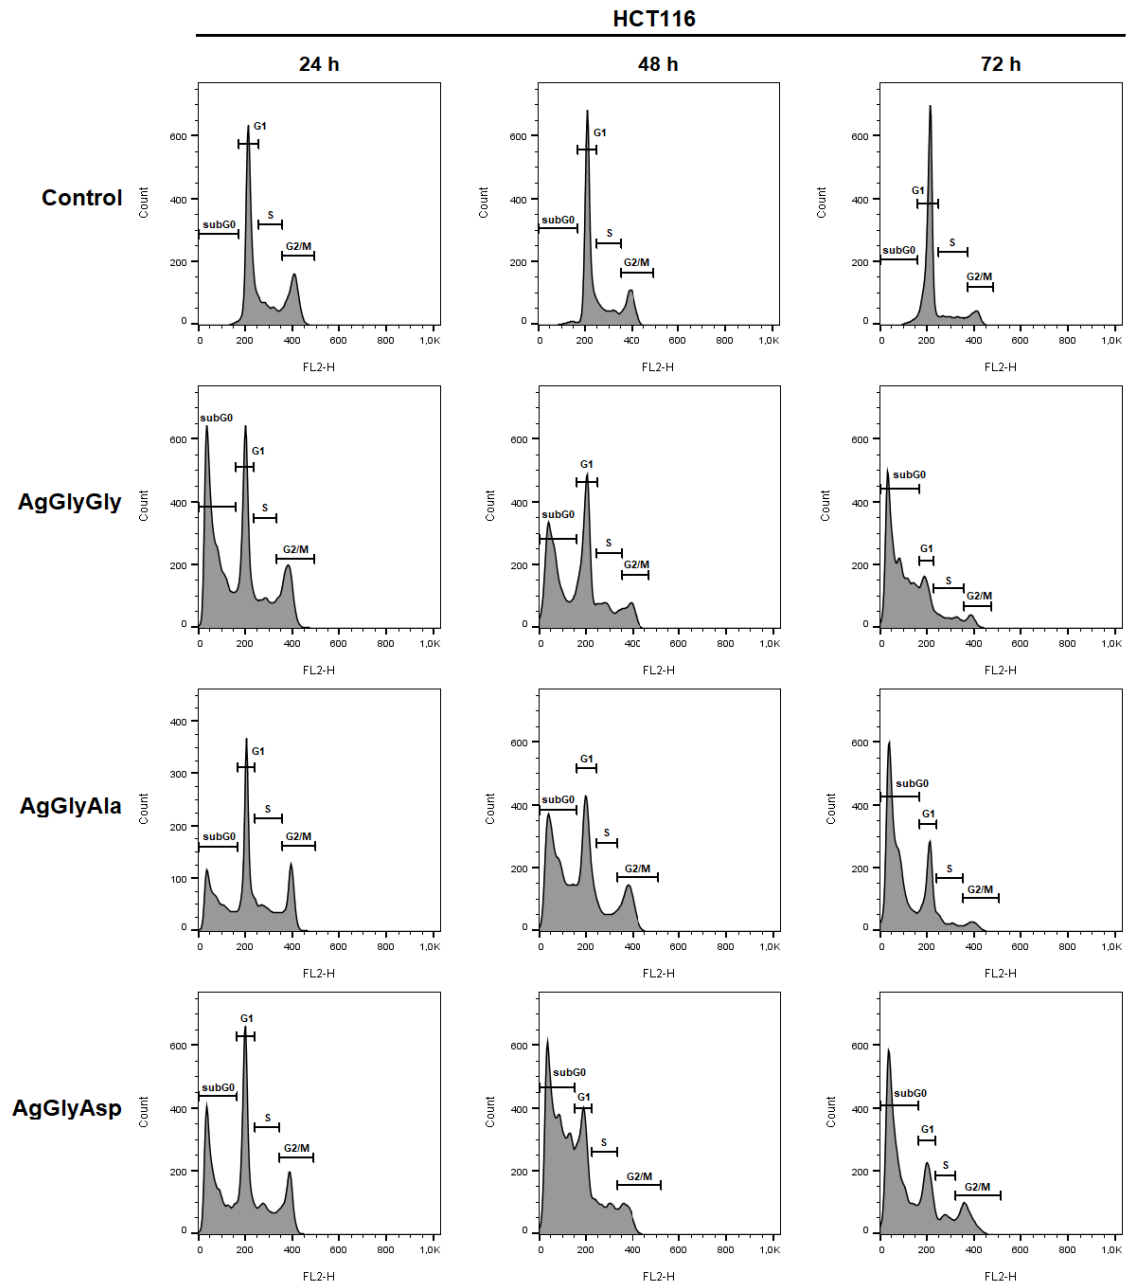

Figure S5. Histogram representation of cell cycle distribution in HCT116 cells treated with IC<sub>50</sub> AgGlyGly, AgGlyAla, AgGlyAsp after 24 h, 48 h, and 72 h. Representative data of three independent experiments are presented.

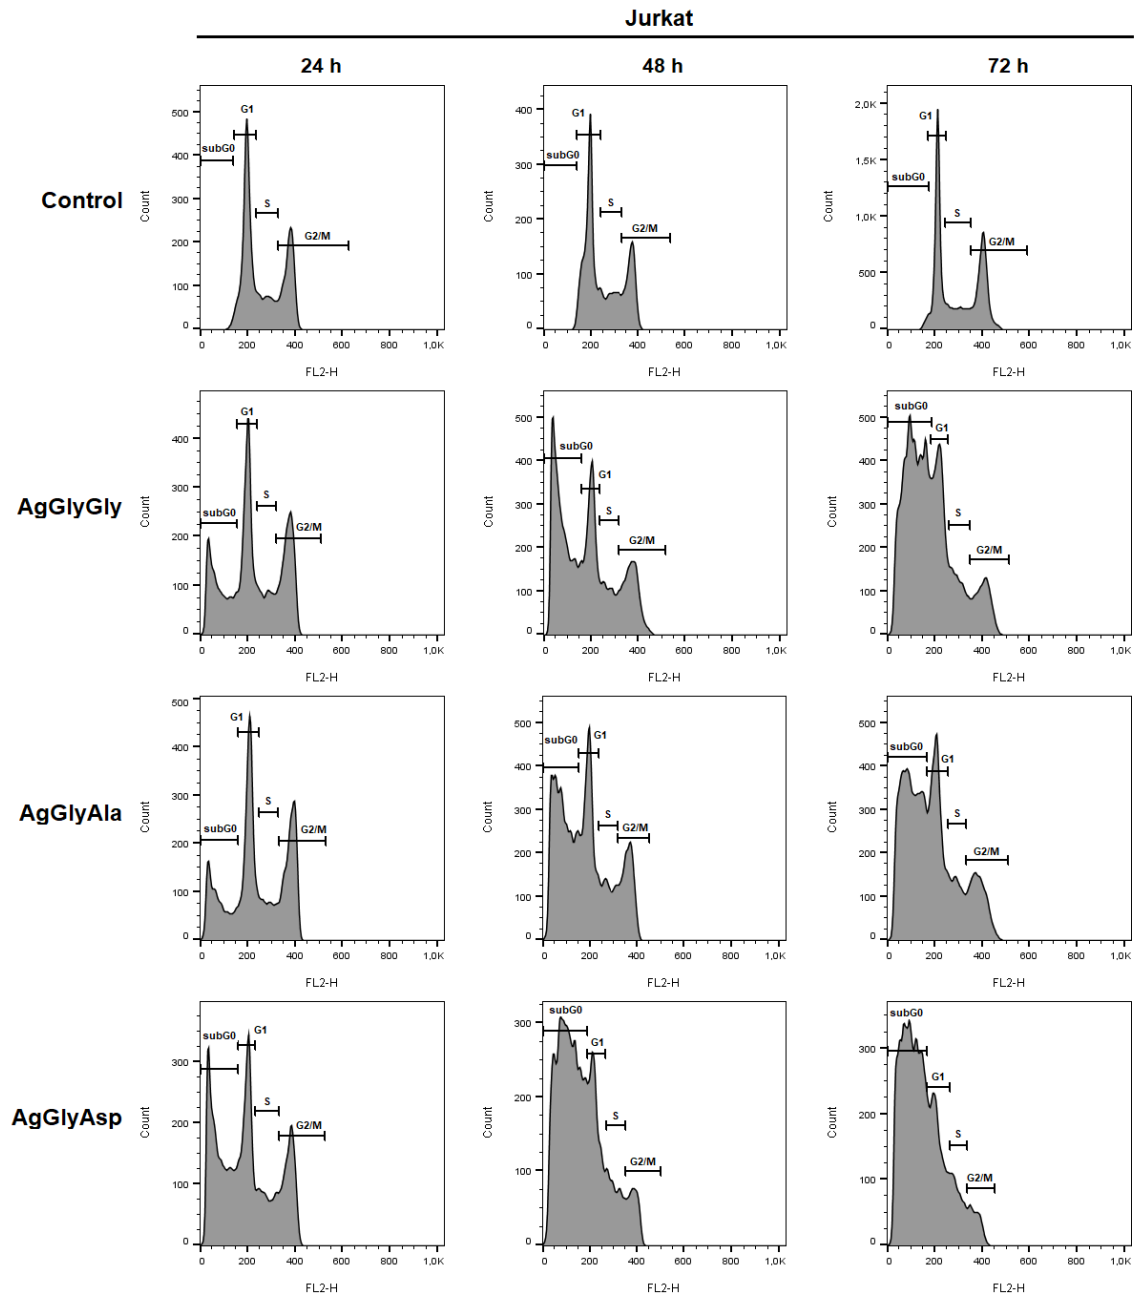

Figure S6 Histogram representation of cell cycle distribution in Jurkat cells treated with IC<sub>50</sub> AgGlyGly, AgGlyAla, AgGlyAsp after 24 h, 48 h, and 72 h. Representative data of three independent experiments are presented.

# MDA-MB-231

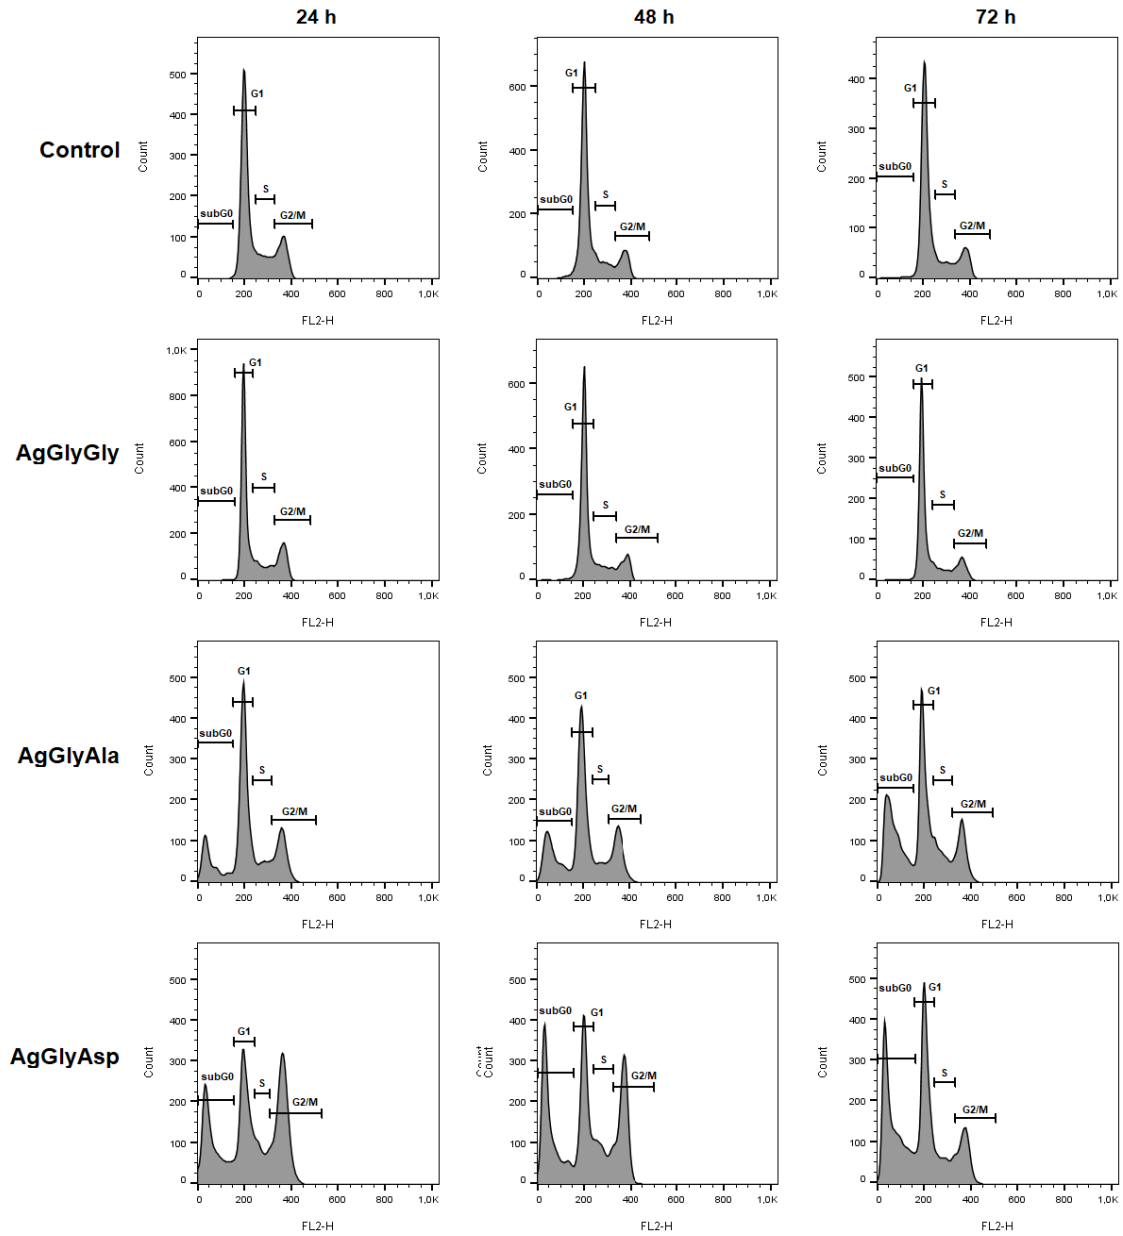

Figure S7. Histogram representation of cell cycle distribution in MDA-MB-231 cells treated with IC<sub>50</sub> AgGlyGly, AgGlyAla, AgGlyAsp after 24 h, 48 h, and 72 h. Representative data of three independent experiments are presented.

Figure S8. Mass spectra of the aqueous solution of AgGlyGly complex measured in positive mode.

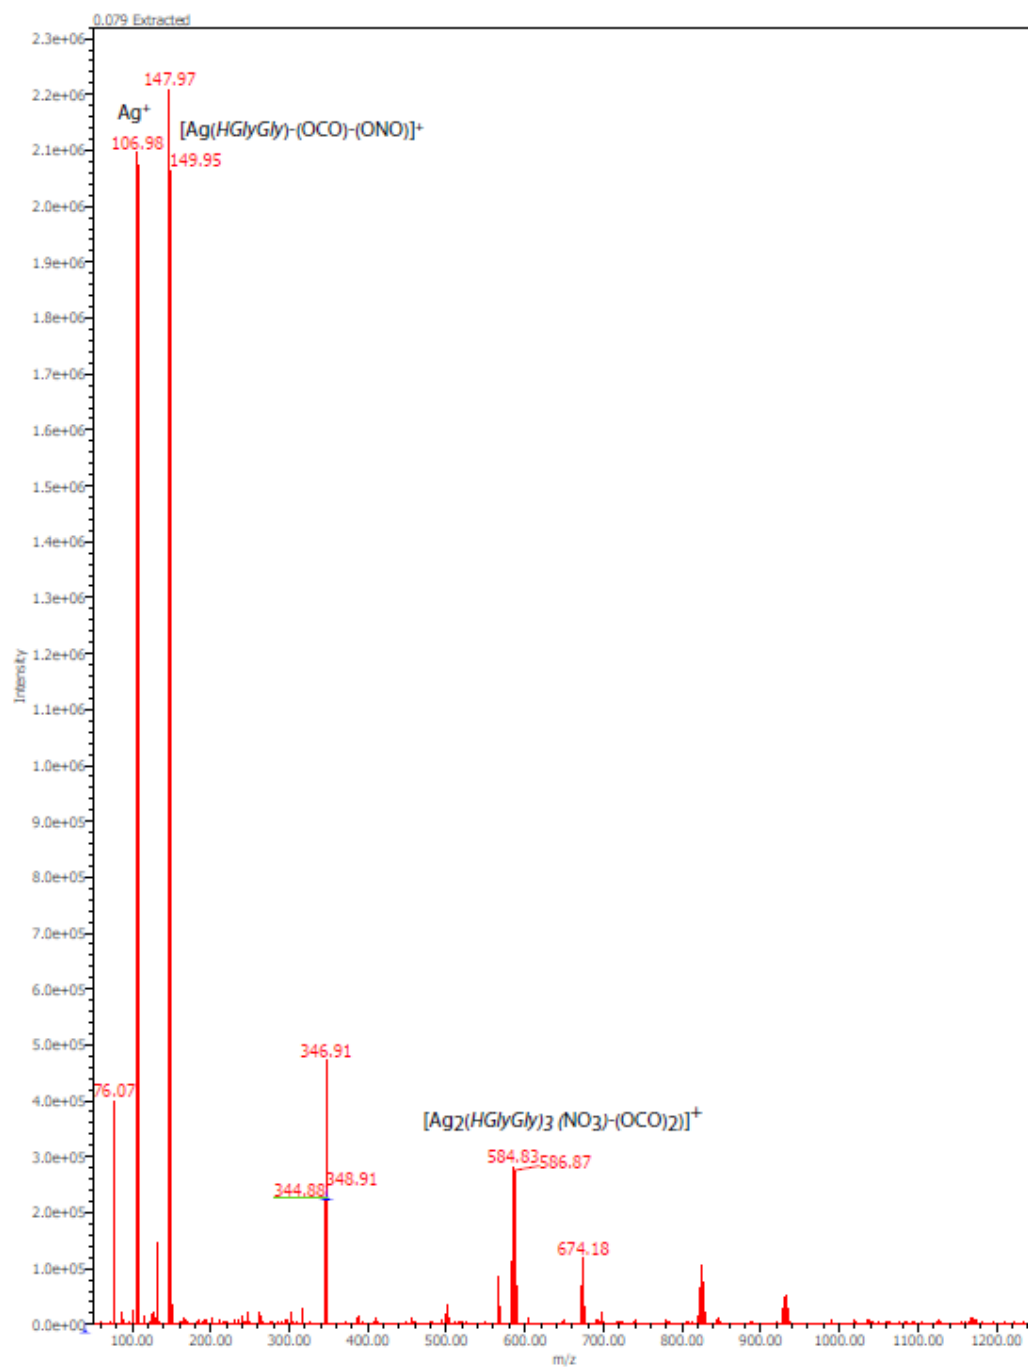



Figure S9. Mass spectra of the aqueous solution of AgGlyAla complex measured in positive mode.

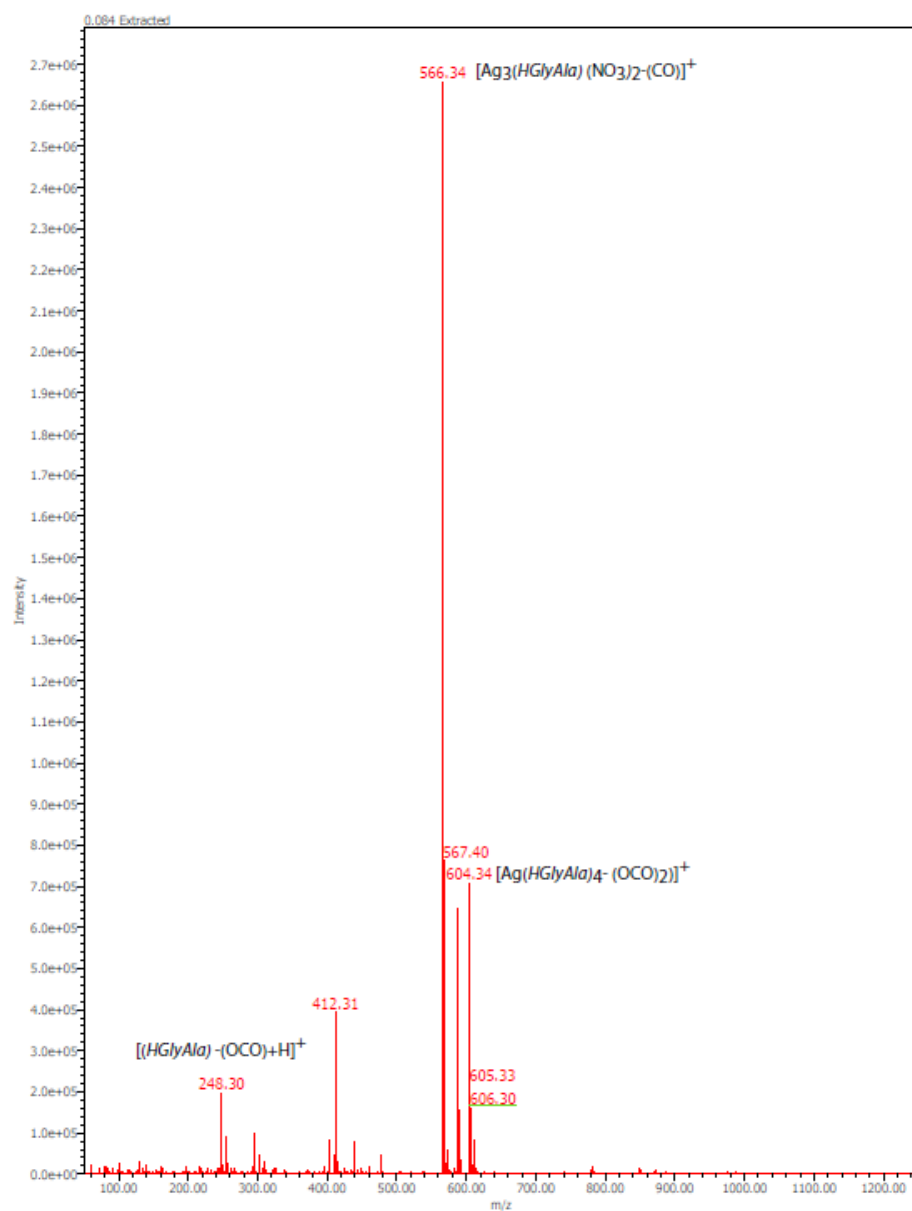

Figure S10. Mass spectra of the methanolic solution of AgGlyAsp complex measured in positive mode.

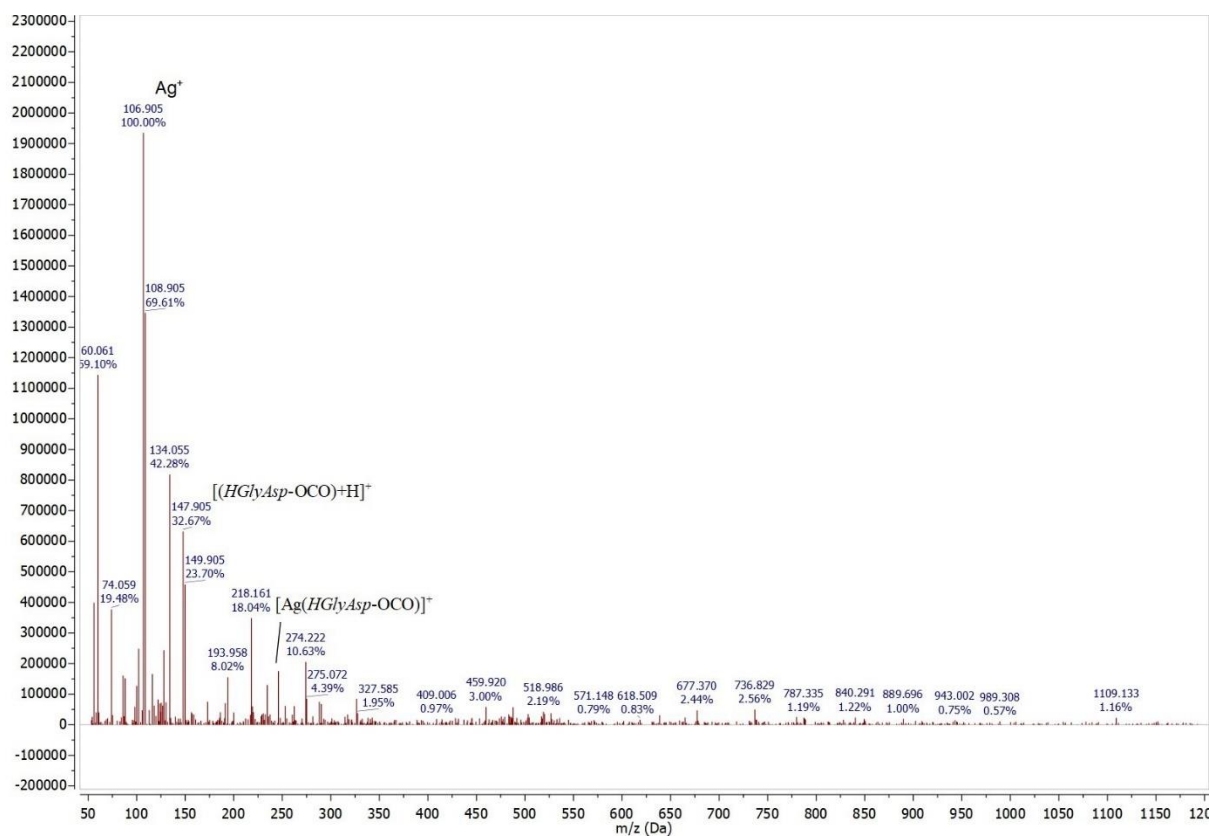

Table S1. Crystal data and structure refinement summary for complex AgGlyGly

|                                                                              |                                                                |
|------------------------------------------------------------------------------|----------------------------------------------------------------|
| Formula                                                                      | [Ag(HGlyGly)] <sub>n</sub> (NO <sub>3</sub> ) <sub>n</sub>     |
| Acronym                                                                      | AgGlyGly                                                       |
| Empirical formula                                                            | C <sub>4</sub> H <sub>8</sub> Ag N <sub>3</sub> O <sub>6</sub> |
| Formula weight                                                               | 301.99                                                         |
| <i>Crystal parameters</i>                                                    |                                                                |
| Crystal size (mm)                                                            | 0.981 x 0.580 x 0.194                                          |
| Crystal system                                                               | Monoclinic                                                     |
| Space group                                                                  | <i>P</i> 2 <sub>1</sub> / <i>c</i>                             |
| <i>Unit cell dimension</i>                                                   |                                                                |
| <i>a</i> (Å)                                                                 | 4.9778 (7)                                                     |
| <i>b</i> (Å)                                                                 | 27.387 (4)                                                     |
| <i>c</i> (Å)                                                                 | 5.9015 (8)                                                     |
| $\alpha$ (°)                                                                 | 90                                                             |
| $\beta$ (°)                                                                  | 94.022 (2)                                                     |
| $\gamma$ (°)                                                                 | 90                                                             |
| <i>V<sub>c</sub></i> (Å <sup>3</sup> )                                       | 802.6(2)                                                       |
| Molecules per cell, <i>Z</i>                                                 | 4                                                              |
| <i>D<sub>calc</sub></i> (g.cm <sup>-3</sup> )                                | 5.574                                                          |
| <i>Measurement of intensity data</i>                                         |                                                                |
| Temperature (K)                                                              | 120(2)                                                         |
| Wavelength (Å)                                                               | 0.71073                                                        |
| $\theta$ range (°)                                                           | 1.487 to 26.072                                                |
| Reflections collected / unique                                               | 10247 / 1580 [R(int) = 0.0284]                                 |
| Data                                                                         | 1580                                                           |
| <i>F</i> (000)                                                               | 592                                                            |
| <i>Indices limit</i>                                                         |                                                                |
| <i>H</i>                                                                     | -6 to 6                                                        |
| <i>K</i>                                                                     | -33 to 33                                                      |
| <i>L</i>                                                                     | -7 to 7                                                        |
| <i>Refinement</i>                                                            |                                                                |
| Refinement method                                                            | full-matrix least-squares on <i>F</i> <sup>2</sup>             |
| Parameters                                                                   | 133                                                            |
| Goodness-of-fit on <i>F</i> <sup>2</sup>                                     | 1.256                                                          |
| <i>R<sub>I</sub></i>                                                         | 0.035                                                          |
| <i>wR<sub>2</sub></i>                                                        | 0.093                                                          |
| Maximum and minimum height in final difference synthesis (e.Å <sup>3</sup> ) | 2.042 and -0.769                                               |

Table S2. Selected bond distances (Å) and angles (°) for AgGlyGly.

| Bond distances       |            |        |           |
|----------------------|------------|--------|-----------|
| Ag1—O2 <sup>i</sup>  | 2.198 (4)  | C3—O3  | 1.229 (7) |
| Ag1—O1               | 2.206 (4)  | C3—C4  | 1.521(7)  |
| Ag1—O2 <sup>ii</sup> | 2.595 (4)  | C4—N2  | 1.488 (7) |
| Ag1—Ag <sup>i</sup>  | 2.8928 (9) | C4—H4A | 0.9900    |
| O1—C1                | 1.252 (7)  | C4—H4B | 0.9900    |
| C1—O2                | 1.265 (7)  | N2—H2C | 0.9100    |
| C1—C2                | 1.518 (7)  | N2—H2D | 0.9100    |
| C2—N1                | 1.450 (7)  | N2—H2E | 0.9100    |
| C2—H2A               | 0.9900     | N3—O5  | 1.236 (6) |
| C2—H2B               | 0.9900     | N3—O4  | 1.262 (6) |
| N1—C3                | 1.342 (7)  | N3—O6  | 1.269 (6) |
| N1—H3N               | 0.88 (7)   |        |           |

  

| Bond angles                             |             |                                        |            |
|-----------------------------------------|-------------|----------------------------------------|------------|
| O2 <sup>i</sup> —Ag1—O1                 | 161.57 (15) | O2 <sup>ii</sup> —Ag1—Ag1 <sup>i</sup> | 119.35 (9) |
| O2 <sup>i</sup> —Ag1—O2 <sup>ii</sup>   | 85.64 (14)  | C1—O1—Ag1                              | 116.0 (3)  |
| O1—Ag1—O2 <sup>ii</sup>                 | 97.66 (14)  | O1—C1—O2                               | 126.9 (5)  |
| O2 <sup>i</sup> —Ag1—Ag1 <sup>i</sup>   | 74.58 (10)  | O1—C1—C2                               | 118.7 (5)  |
| O1—Ag1—Ag1 <sup>i</sup>                 | 88.14 (10)  | O2—C1—C2                               | 114.4 (5)  |
| C1—O2—Ag1 <sup>i</sup>                  | 132.9 (4)   | N2—C4—H4A                              | 110.0      |
| C1—O2—Ag1 <sup>iii</sup>                | 118.1 (3)   | C3—C4—H4A                              | 110.0      |
| Ag1 <sup>i</sup> —O2—Ag1 <sup>iii</sup> | 94.36 (14)  | N2—C4—H4B                              | 110.0      |
| N1—C2—C1                                | 112.7 (5)   | C3—C4—H4B                              | 110.0      |
| N1—C2—H2A                               | 109.0       | H4A—C4—H4B                             | 108.3      |
| C1—C2—H2A                               | 109.0       | C4—N2—H2C                              | 109.5      |
| N1—C2—H2B                               | 109.0       | C4—N2—H2D                              | 109.5      |
| C1—C2—H2B                               | 109.0       | H2C—N2—H2D                             | 109.5      |
| H2A—C2—H2B                              | 107.8       | C4—N2—H2E                              | 109.5      |
| C3—N1—C2                                | 120.6 (5)   | H2C—N2—H2E                             | 109.5      |
| C3—N1—H3N                               | 118 (4)     | H2D—N2—H2E                             | 109.5      |
| C2—N1—H3N                               | 120 (4)     | O5—N3—O4                               | 120.7 (5)  |
| O3—C3—N1                                | 123.7 (5)   | O5—N3—O6                               | 120.6 (5)  |
| O3—C3—C4                                | 121.8 (5)   | O4—N3—O6                               | 118.7 (4)  |
| N1—C3—C4                                | 114.5 (5)   |                                        |            |
| N2—C4—C3                                | 108.7 (4)   |                                        |            |

Symmetry codes: (i) -x,-y,-z+3; (ii) x-1,y,z ; (iii) x+1,y,z

Table S3. Antibacterial activity of silver complex and free ligands (IC<sub>50</sub>, MIC<sub>90</sub>: μmol.l<sup>-1</sup>).

|                 | <i>E. coli</i>   |                   | <i>S. aureus</i> |                   | <i>S. aureus</i> L12 |                   | <i>S.epidermidis</i> |                   |
|-----------------|------------------|-------------------|------------------|-------------------|----------------------|-------------------|----------------------|-------------------|
|                 | IC <sub>50</sub> | MIC <sub>90</sub> | IC <sub>50</sub> | MIC <sub>90</sub> | IC <sub>50</sub>     | MIC <sub>90</sub> | IC <sub>50</sub>     | MIC <sub>90</sub> |
| Gly             |                  | N                 |                  | N                 |                      | N                 |                      | N                 |
| Ala             |                  | N                 |                  | N                 |                      | N                 |                      | N                 |
| GlyGly          |                  | N                 |                  | N                 |                      | N                 |                      | N                 |
| GlyAla          |                  | N                 |                  | N                 |                      | N                 |                      | N                 |
| GlyAsp          |                  | N                 |                  | N                 |                      | N                 |                      | N                 |
| AgSD            | 1                | 4                 | 1                | 2                 | 1                    | 4                 | 2                    | 5                 |
| <b>AgGly</b>    | <b>3</b>         | <b>5</b>          | <b>3</b>         | <b>5</b>          | <b>5</b>             | <b>10</b>         | <b>5</b>             | <b>10</b>         |
| <b>AgAla</b>    | <b>3</b>         | <b>5</b>          | <b>4</b>         | <b>6</b>          | <b>5</b>             | <b>10</b>         | <b>3</b>             | <b>10</b>         |
| AgGlyGly        | 6                | 10                | 12               | 22                | 15                   | 38                | 10                   | 20                |
| <b>AgGlyAla</b> | <b>6</b>         | <b>9</b>          | <b>7</b>         | <b>11</b>         | <b>9</b>             | <b>20</b>         | <b>8</b>             | <b>10</b>         |
| AgGlyAsp        | 17               | 23                | 51               | 96                | 31                   | 49                | 25                   | 50                |

Note: N- not active IC<sub>50</sub> and MIC<sub>90</sub> values > 2 mmol.l<sup>-1</sup>, Gly – glycine, Ala - alanine, SD-sulfadiazine

Table S4. Antifungal activity of silver complexes and free ligands.

|          | <i>C. parapsilosis</i> |                   | <i>C. albicans</i> |                   | <i>Rhizopus oryzae</i> |                    | <i>A. alternata</i> |                    | <i>A.flavus</i>  |                    | <i>M.gypseum</i> |                    |
|----------|------------------------|-------------------|--------------------|-------------------|------------------------|--------------------|---------------------|--------------------|------------------|--------------------|------------------|--------------------|
|          | IC <sub>50</sub>       | MIC <sub>80</sub> | IC <sub>50</sub>   | MIC <sub>80</sub> | IC <sub>50</sub>       | MIC <sub>100</sub> | IC <sub>50</sub>    | MIC <sub>100</sub> | IC <sub>50</sub> | MIC <sub>100</sub> | IC <sub>50</sub> | MIC <sub>100</sub> |
| Gly      | N                      |                   | N                  |                   | N                      |                    | N                   |                    | N                |                    | N                |                    |
| Ala      | N                      |                   | N                  |                   | N                      |                    | N                   |                    | N                |                    | N                |                    |
| GlyGly   | N                      |                   | N                  |                   | N                      |                    | N                   |                    | N                |                    | N                |                    |
| GlyAla   | N                      |                   | N                  |                   | N                      |                    | N                   |                    | N                |                    | N                |                    |
| GlyAsp   | N                      |                   | N                  |                   | N                      |                    | N                   |                    | N                |                    | N                |                    |
| AgSD     | 1                      | 5                 | 7                  | 23                | 3                      | 10s                | 8                   | >100               | 46               | 89s                | 30               | 50s                |
| AgGly    | 2,5                    | 5                 | 7                  | 10                | 3                      | 5s                 | 5                   | 10s                | 20               | 100s               | 100              | >100               |
| AgAla    | 25                     | 50                | 7                  | 10                | 30                     | 50s                | >100                | >100               | NA               |                    | 100              | >100               |
| AgGlyGly | 30                     | 70                | 70                 | 100               | 30                     | 50s                | 71                  | >100               | NA               |                    | NA               |                    |
| AgGlyAla | 30                     | 60                | 50                 | 87                | 30                     | 50s                | 42                  | >100               | NA               |                    | 75               | 100s               |
| AgGlyAsp | 50                     | 100               | 73                 | 100               | 73                     | 100s               | 35                  | >100               | NA               |                    | NA               |                    |

Note: N- not active IC<sub>50</sub> and MIC values > 2 mmol.l<sup>-1</sup>, NA – not active IC<sub>50</sub> and MIC values >100μmol.l<sup>-1</sup>, Gly – glycine, Ala - alanine, SD-sulfadiazine,s-fungistatic

Table S5. Cell cycle analysis of BLM cells after 24 h, 48 h, and 72 h incubation with dipeptides complexes.

| <b>BLM</b>       | <b>Sub-G0</b>  | <b>G1</b>      | <b>S</b>     | <b>G2/M</b>   |
|------------------|----------------|----------------|--------------|---------------|
| <b>CTRL 24 h</b> | 2.2 ± 0.7      | 49.2 ± 0.1     | 18.6 ± 0.9   | 30.1 ± 0.3    |
| <b>AgGlyGly</b>  | 17.3 ± 4.2 **  | 32.5 ± 2.8 **  | 14.1 ± 1.0 * | 36.2 ± 1.3 *  |
| <b>AgGlyAla</b>  | 13.5 ± 1.1 *   | 32.6 ± 0.1 **  | 17.9 ± 2.6   | 36.1 ± 0.9 *  |
| <b>AgGlyAsp</b>  | 51.7 ± 0.5 *** | 19.8 ± 2.7 *** | 13.8 ± 3.0 * | 14.8 ± 0.2 ** |
| <b>CTRL 48 h</b> | 2.0 ± 0.7      | 56.3 ± 0.6     | 20.5 ± 0.4   | 21.3 ± 0.4    |
| <b>AgGlyGly</b>  | 18.8 ± 0.1 **  | 33.2 ± 0.9 **  | 15.3 ± 1.5 * | 32.7 ± 2.4 ** |
| <b>AgGlyAla</b>  | 13.7 ± 3.3 *   | 38.0 ± 0.5 **  | 19.5 ± 0.1   | 28.9 ± 2.7 *  |
| <b>AgGlyAsp</b>  | 56.1 ± 0.9 *** | 22.2 ± 2.8 *** | 10.8 ± 2.5 * | 10.9 ± 2.8 *  |
| <b>CTRL 72 h</b> | 1.6 ± 0.5      | 53.2 ± 2.0     | 22.3 ± 2.3   | 23.0 ± 0.9    |
| <b>AgGlyGly</b>  | 22.8 ± 2.8 **  | 34.1 ± 2.9 **  | 16.0 ± 2.5 * | 27.1 ± 2.1 *  |
| <b>AgGlyAla</b>  | 13.8 ± 0.1 *   | 40.1 ± 1.6 **  | 18.8 ± 0.4   | 27.3 ± 1.3    |
| <b>AgGlyAsp</b>  | 59.3 ± 3.4 *** | 16.9 ± 3.5 *** | 14.6 ± 0.9 * | 9.4 ± 0.7 *   |

The data are presented from three independent experiments after 24 h, 48 h, and 72 h treatment as average percentage ± SD. Significantly different \*  $p < 0.05$ , \*\*  $p < 0.01$ , \*\*\*  $p < 0.001$  vs untreated cells (control).

Table S6. Cell cycle analysis of HCT116 cells after 24 h, 48 h, and 72 h incubation with dipeptides complexes.

| <b>HCT116</b>    | <b>Sub-G0</b>  | <b>G1</b>      | <b>S</b>     | <b>G2/M</b>  |
|------------------|----------------|----------------|--------------|--------------|
| <b>CTRL 24 h</b> | 0.8 ± 0.2      | 50.9 ± 3.6     | 18.5 ± 0.7   | 29.8 ± 3.2   |
| <b>AgGlyGly</b>  | 44.3 ± 2.0 *** | 26.3 ± 1.2 **  | 13.6 ± 2.4 * | 15.8 ± 0.8 * |
| <b>AgGlyAla</b>  | 32.4 ± 0.9 **  | 37.8 ± 2.4 **  | 18.9 ± 0.8   | 10.9 ± 2.5 * |
| <b>AgGlyAsp</b>  | 37.2 ± 1.3 **  | 29.8 ± 3.4 **  | 16.3 ± 2.3   | 16.8 ± 2.4 * |
| <b>CTRL 48 h</b> | 3.7 ± 0.8      | 56.2 ± 3.9     | 20.0 ± 2.4   | 20.3 ± 0.7   |
| <b>AgGlyGly</b>  | 50.8 ± 2.0 *** | 24.8 ± 1.1 **  | 13.7 ± 0.7 * | 10.8 ± 2.5 * |
| <b>AgGlyAla</b>  | 46.2 ± 0.4 *** | 32.9 ± 1.2 **  | 7.0 ± 0.3 *  | 14.0 ± 0.4 * |
| <b>AgGlyAsp</b>  | 57.1 ± 0.4 *** | 21.0 ± 1.7 *** | 10.3 ± 1.3 * | 11.7 ± 3.4 * |
| <b>CTRL 72 h</b> | 3.5 ± 0.1      | 69.4 ± 0.9     | 13.5 ± 0.5   | 13.6 ± 0.4   |
| <b>AgGlyGly</b>  | 62.9 ± 5.3 *** | 20.3 ± 2.9 *** | 9.8 ± 0.1 *  | 7.1 ± 2.3 *  |
| <b>AgGlyAla</b>  | 56.8 ± 4.3 *** | 27.6 ± 2.6 *** | 8.1 ± 1.2 *  | 7.6 ± 1.7 *  |
| <b>AgGlyAsp</b>  | 62.7 ± 1.6 *** | 20.3 ± 0.3 *** | 7.7 ± 0.1 *  | 9.3 ± 2.0 *  |

The data are presented from three independent experiments after 24 h, 48 h, and 72 h treatment as average percentage ± SD. Significantly different \*  $p < 0.05$ , \*\*  $p < 0.01$ , \*\*\*  $p < 0.001$  vs untreated cells (control).

Table S7. Cell cycle analysis of Jurkat cells after 24 h, 48 h, and 72 h incubation with dipeptides complexes.

| <b>Jurkat</b>    | <b>Sub-G0</b>  | <b>G1</b>     | <b>S</b>     | <b>G2/M</b>   |
|------------------|----------------|---------------|--------------|---------------|
| <b>CTRL 24 h</b> | 1.0 ± 0.1      | 50.1 ± 0.2    | 16.2 ± 1.3   | 32.8 ± 1.5    |
| <b>AgGlyGly</b>  | 25.9 ± 0.3 **  | 34.5 ± 0.8 ** | 12.8 ± 0.1 * | 26.9 ± 0.4 *  |
| <b>AgGlyAla</b>  | 20.4 ± 1.9 **  | 36.1 ± 0.4 ** | 12.7 ± 0.1 * | 30.9 ± 1.5    |
| <b>AgGlyAsp</b>  | 46.9 ± 3.2 *** | 23.6 ± 1.9 ** | 14.0 ± 0.6   | 15.5 ± 2.7 *  |
| <b>CTRL 48 h</b> | 0.7 ± 0.4      | 53.0 ± 1.2    | 22.1 ± 1.5   | 24.3 ± 0.6    |
| <b>AgGlyGly</b>  | 46.1 ± 0.1 *** | 25.6 ± 0.8 ** | 11.8 ± 0.5 * | 16.6 ± 1.3 *  |
| <b>AgGlyAla</b>  | 39.7 ± 3.7 *** | 29.9 ± 1.3 ** | 12.6 ± 0.5 * | 17.9 ± 1.8 *  |
| <b>AgGlyAsp</b>  | 57.4 ± 4.2 *** | 24.0 ± 3.4 ** | 12.4 ± 1.1 * | 6.3 ± 0.3 *   |
| <b>CTRL 72 h</b> | 2.3 ± 0.3      | 46.8 ± 2.9    | 16.6 ± 1.2   | 34.4 ± 1.3    |
| <b>AgGlyGly</b>  | 57.0 ± 0.6 *** | 23.0 ± 0.1 ** | 11.1 ± 0.8 * | 8.9 ± 0.1 **  |
| <b>AgGlyAla</b>  | 53.2 ± 3.6 *** | 24.4 ± 2.3 ** | 12.1 ± 1.8 * | 10.3 ± 3.1 ** |
| <b>AgGlyAsp</b>  | 59.4 ± 1.8 *** | 23.8 ± 0.1 ** | 11.1 ± 1.8 * | 5.8 ± 0.2 **  |

The data are presented from three independent experiments after 24 h, 48 h, and 72 h treatment as average percentage ± SD. Significantly different \* $p < 0.05$ , \*\* $p < 0.01$ , \*\*\* $p < 0.001$  vs untreated cells (control).



Table S8. Cell cycle analysis of MDA-MB-231 cells after 24 h, 48 h, and 72 h incubation with dipeptides complexes.

| <b>MDA-MB-231</b> | <b>Sub-G0</b>  | <b>G1</b>      | <b>S</b>     | <b>G2/M</b>  |
|-------------------|----------------|----------------|--------------|--------------|
| <b>CTRL 24 h</b>  | 1.0 ± 0.6      | 66.4 ± 1.3     | 14.1 ± 1.4   | 18.6 ± 0.5   |
| <b>AgGlyGly</b>   | 1.8 ± 0.4      | 62.3 ± 0.2     | 16.6 ± 0.3   | 19.3 ± 0.9   |
| <b>AgGlyAla</b>   | 17.7 ± 3.0 *   | 48.3 ± 0.2 **  | 11.2 ± 2.0   | 22.8 ± 2.5 * |
| <b>AgGlyAsp</b>   | 24.7 ± 2.0 **  | 37.2 ± 4.2 **  | 7.6 ± 2.5 *  | 30.6 ± 2.4 * |
| <b>CTRL 48 h</b>  | 1.9 ± 0.4      | 68.5 ± 1.7     | 14.4 ± 1.3   | 15.3 ± 0.7   |
| <b>AgGlyGly</b>   | 2.1 ± 0.2      | 68.4 ± 0.1     | 14.7 ± 0.2   | 14.9 ± 0.3   |
| <b>AgGlyAla</b>   | 21.1 ± 2.5 **  | 48.5 ± 1.8 **  | 11.1 ± 0.7   | 19.4 ± 0.1 * |
| <b>AgGlyAsp</b>   | 35.8 ± 2.2 **  | 27.8 ± 0.8 *** | 10.6 ± 1.9 * | 25.8 ± 0.5 * |
| <b>CTRL 72 h</b>  | 2.2 ± 0.3      | 69.2 ± 0.1     | 13.8 ± 0.9   | 14.9 ± 0.5   |
| <b>AgGlyGly</b>   | 2.3 ± 0.1      | 68.5 ± 0.1     | 14.4 ± 0.1   | 14.9 ± 0.1   |
| <b>AgGlyAla</b>   | 40.5 ± 3.3 *** | 35.0 ± 2.3 **  | 10.9 ± 1.3   | 13.7 ± 1.8   |
| <b>AgGlyAsp</b>   | 55.9 ± 0.5 *** | 27.4 ± 2.3 *** | 7.1 ± 2.4 *  | 9.6 ± 1.2 *  |

The data are presented from three independent experiments after 24 h, 48 h, and 72 h treatment as average percentage ± SD. Significantly different \*  $p < 0.05$ , \*\*  $p < 0.01$ , \*\*\*  $p < 0.001$  vs untreated cells (control).
